# Supplementary material for: Defining bacterial species in the genomic era: insights from the genus Acinetobacter
Source: PubMed Central journal article supplement (PMC3556118; doi:10.1186/1471-2180-12-302), 2012-12-23
Supplement: 1471-2180-12-302-S1.pdf [file 1471-2180-12-302-S1.pdf]

**Supplementary Table 1.** The 38 sequenced *Acinetobacter* strains used in this study.

| Species                 | Strain         | Accession no. <sup>1</sup>                        | Isolation source                                                             | Geographical location  | Isolation date | Status   | Percentage strain-specific CDSs (within genus) | Reference                                                  |
|-------------------------|----------------|---------------------------------------------------|------------------------------------------------------------------------------|------------------------|----------------|----------|------------------------------------------------|------------------------------------------------------------|
| <i>A. baumannii</i>     | 6013113        | ACYR00000000*                                     | Skin                                                                         | Selly Oak Hospital, UK | 2007           | WGS      | 0.2%                                           | The Genome Institute at Washington University <sup>2</sup> |
| <i>A. baumannii</i>     | 6013150        | ACYQ00000000*                                     | Skin                                                                         | Selly Oak Hospital, UK | 2007           | WGS      | 0.2%                                           | The Genome Institute at Washington University <sup>2</sup> |
| <i>A. baumannii</i>     | 6014059        | ACYS00000000*                                     | Skin                                                                         | Selly Oak Hospital, UK | 2007           | WGS      | 1.0%                                           | The Genome Institute at Washington University <sup>2</sup> |
| <i>A. baumannii</i>     | AB0057         | NC_011586 (NC_011585)                             | Blood                                                                        | WRAMC, USA             | 2004           | Complete | 1.4%                                           | (4)                                                        |
| <i>A. baumannii</i>     | AB307-0294     | NC_011595                                         | Blood                                                                        | Buffalo, NY, USA       | 1994           | Complete | 0.7%                                           | (4)                                                        |
| <i>A. baumannii</i>     | AB900          | ABXK00000000*                                     | Perineum                                                                     | WRAMC, USA             | 2003           | Draft    | 3.7%                                           | (4)                                                        |
| <i>A. baumannii</i>     | ACICU          | NC_010611 (NC_010605, NC_010606)                  | CF fluid                                                                     | Rome, Italy            | 2005           | Complete | 1.9%                                           | (5)                                                        |
| <i>A. baumannii</i>     | ATCC 17978     | NC_009085 (NC_009083, NC_009084)                  | Meningitis                                                                   | Unknown                | 1951           | Complete | 1.1%                                           | (6)                                                        |
| <i>A. baumannii</i>     | ATCC 19606 (T) | ACQB00000000*                                     | Urinary tract infection                                                      | USA                    | 1948           | WGS      | 3.1%                                           | Broad Institute <sup>3</sup>                               |
| <i>A. baumannii</i>     | AYE            | CU459141 (CU459137, CU459138, CU459140, CU459139) | Pneumonia & urine infection                                                  | France                 | 2001           | Complete | 1.3%                                           | (7)                                                        |
| <i>A. baumannii</i>     | NCTC 7422      | AIED00000000*                                     | Leg burn                                                                     | Unknown                | 1968           | WGS      | 8.5%                                           | This study                                                 |
| <i>A. baumannii</i>     | SDF            | CU468230 (CU468231, CU468232, CU468233)           | Human Louse                                                                  | France                 | 2000           | Complete | 4.8%                                           | (7)                                                        |
| <i>A. baumannii</i>     | TCDC-AB0715    | CP002522 (CP002523, CP002524)                     | Clinical isolate                                                             | Taiwan                 | 2007-2009      | Complete | 0.7%                                           | (8)                                                        |
| <i>A. baumannii</i>     | W6976          | AIEG00000000*                                     | Clinical isolate from line tip                                               | London, UK             | 2009           | WGS      | 0.1%                                           | This study                                                 |
| <i>A. baumannii</i>     | W7282          | AIEH00000000*                                     | Clinical isolate from intra-abdominal drain fluid post-tigecycline treatment | London, UK             | 2009           | WGS      | 0.1%                                           | This study                                                 |
| <i>A. baylyi</i>        | ADP1           | NC_005966                                         | Mutant of a soil isolate                                                     | Unknown                | 1969           | Complete | 11.0%                                          | (9)                                                        |
| <i>A. bereziniae</i>    | LMG 1003 (T)   | AIEI00000000*                                     | Wound                                                                        | Unknown                | 1966           | WGS      | 23.7%                                          | This study                                                 |
| <i>A. calcoaceticus</i> | DSM 30006 (T)  | AIEC00000000*                                     | Quinate enrichment from soil                                                 | Unknown                | 1911           | WGS      | 3.1%                                           | This study                                                 |
| <i>A. calcoaceticus</i> | PHEA-2         | CP002177                                          | Industrial wastewater                                                        | China                  | 2000           | Complete | 1.2%                                           | (10, 11)                                                   |
| <i>A. calcoaceticus</i> | RUH2202        | ACPK00000000*                                     | Human skin wound                                                             | Malmo, Sweden          | Unknown        | WGS      | 2.5%                                           | Broad Institute <sup>3</sup>                               |
| <i>A. haemolyticus</i>  | ATCC 19194     | ADMT00000000*                                     | Nose                                                                         | Unknown                | Unknown        | Draft    | 6.8%                                           | HMP                                                        |
| <i>A. johnsonii</i>     | SH046          | ACPL00000000*                                     | Perineum                                                                     | Unknown                | 1993           | WGS      | 11.1%                                          | Broad Institute <sup>3</sup>                               |
| <i>A. junii</i>         | SH205          | ACPM00000000*                                     | Perineum                                                                     | Unknown                | 1994           | WGS      | 6.6%                                           | Broad Institute <sup>3</sup>                               |

|                          |               |               |                                             |                         |         |          |      |                              |
|--------------------------|---------------|---------------|---------------------------------------------|-------------------------|---------|----------|------|------------------------------|
| <i>A. lwoffii</i>        | NCTC 5866 (T) | AIEL00000000* | Unknown                                     | Paris                   | 1939    | WGS      | 7.6% | This study                   |
| <i>A. lwoffii</i>        | SH145         | CM001194      | Hand                                        | Unknown                 | 1994    | WGS      | 7.3% | Broad Institute <sup>3</sup> |
| <i>A. nosocomialis</i>   | NCTC 8102     | AIEJ00000000* | Fecal specimens                             | Rhode Island, USA       | 1944    | WGS      | 3.2% | This study                   |
| <i>A. nosocomialis</i>   | NCTC 10304    | AIEE00000000* | Conjunctiva                                 | Unknown                 | 1962    | WGS      | 4.1% | This study                   |
| <i>A. nosocomialis</i>   | RUH2624       | ACQF00000000* | Human skin swab                             | Unknown                 | Unknown | Draft    | 2.4% | HMP                          |
| <i>A. oleivorans</i>     | DR1           | CP002080      | Rice paddy soil                             | Deok-So, South Korea    | 2010    | Complete | 6.7% | (12)                         |
| <i>A. parvus</i>         | DSM 16617 (T) | AIEB00000000* | Human ear                                   | Pribram, Czech Republic | 1996    | WGS      | 1.9% | This study                   |
| <i>A. pittii</i>         | DSM 9306      | AIEF00000000* | Urine                                       | Unknown                 | 1990    | WGS      | 1.1% | This study                   |
| <i>A. pittii</i>         | DSM 21653 (T) | AIEK00000000* | Cerebrospinal fluid                         | Unknown                 | Unknown | WGS      | 1.6% | This study                   |
| <i>A. pittii</i>         | SH024         | ADCH00000000* | Skin                                        | Unknown                 | Unknown | Draft    | 6.3% | Broad Institute <sup>3</sup> |
| <i>A. radioresistens</i> | DSM 6976 (T)  | AIDZ00000000* | Cotton tampon sterilized by gamma radiation | Unknown                 | 1979    | WGS      | 1.7% | This study                   |
| <i>A. radioresistens</i> | SH164         | ACPO00000000* | Human forehead                              | Unknown                 | 1994    | Draft    | 3.8% | Broad Institute <sup>3</sup> |
| <i>A. radioresistens</i> | SK82          | ACVR00000000* | Human skin                                  | Unknown                 | Unknown | Draft    | 5.6% | HMP                          |
| Unnamed                  | ATCC 27244    | ABYN01000000  | Cervix                                      | Unknown                 | Unknown | WGS      | 4.6% | HMP                          |
| <i>A. ursingii</i>       | DSM 16037 (T) | AIEA00000000* | Blood                                       | Unknown                 | 1993    | WGS      | 8.3% | This study                   |

\* Genome project accession number.

<sup>1</sup> The accession numbers of the plasmids belonging to their associated strains are shown in parentheses

<sup>2</sup> Further information can be found at <http://genome.wustl.edu/genomes/category/microorganisms/>

<sup>3</sup> Further information can be found at [www.broadinstitute.org/annotation/genome/Acinetobacter\\_group/GenomeDescriptions.html](http://www.broadinstitute.org/annotation/genome/Acinetobacter_group/GenomeDescriptions.html)

HMP = Human Microbiome Project
