# Supplementary material for: Defining bacterial species in the genomic era: insights from the genus Acinetobacter
Source: PubMed Central journal article supplement (PMC3556118; doi:10.1186/1471-2180-12-302), 2012-12-23
Supplement: 1471-2180-12-302-S4.pdf [file 1471-2180-12-302-S4.pdf]

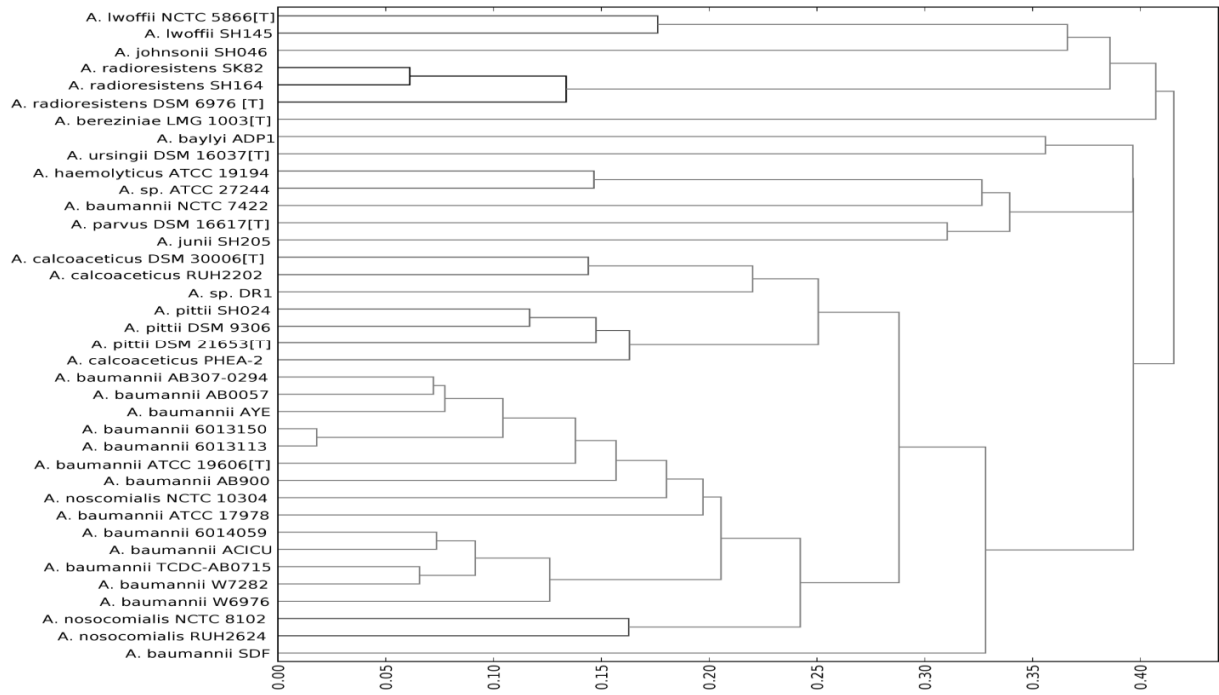

**Additional File 4.** Relationship dendrogram of the 38 strains based on the alignment-free K-string analysis proposed by Qi *et al.* [54] with  $k = 5$ . *A. baumannii* SDF is placed outside the ACB complex. This is probably due to the difference in CDS repertoires between this drug-sensitive strain and all other genome-sequenced *A. baumannii*.
