# Supplementary material for: Defining bacterial species in the genomic era: insights from the genus Acinetobacter
Source: PubMed Central journal article supplement (PMC3556118; doi:10.1186/1471-2180-12-302), 2012-12-23
Supplement: 1471-2180-12-302-S6.pdf [file 1471-2180-12-302-S6.pdf]

|                                | A. ursingii DSM 16037 (T) | A. baylyi ADP1 | A. nosocomialis RUH2624 | A. nosocomialis NCTC 8102 | A. baumannii ATCC 17978 | A. nosocomialis NCTC 10304 | A. baumannii ATCC 19606 (T) | A. baumannii SDF | A. baumannii AB900 | A. baumannii 6013113 | A. baumannii 6013150 | A. baumannii AB0057 | A. baumannii AYE | A. baumannii AB307-0294 | A. baumannii ACICU | A. baumannii 6014059 | A. baumannii TCDC-AB0715 | A. baumannii W6976 | A. baumannii W7282 | A. calcoaceticus PHEA-2 | A. pittii DSM 21653 (T) | A. pittii DSM 9306 | A. pittii SH024 | A. sp. DR1 | A. calcoaceticus RUH2202 | A. calcoaceticus DSM 30006 (T) | A. sp. ATCC 27244 | A. haemolyticus ATCC 19194 | A. junii SH205 | A. baumannii NCTC 7422 | A. parvus DSM 16617 (T) | A. radioresistens DSM 6976 (T) | A. radioresistens SH164 | A. radioresistens SK82 | A. bereziniae LMG1003 (T) | A. johnsonii SH046 | A. lwofii SH145 |  |  |
|--------------------------------|---------------------------|----------------|-------------------------|---------------------------|-------------------------|----------------------------|-----------------------------|------------------|--------------------|----------------------|----------------------|---------------------|------------------|-------------------------|--------------------|----------------------|--------------------------|--------------------|--------------------|-------------------------|-------------------------|--------------------|-----------------|------------|--------------------------|--------------------------------|-------------------|----------------------------|----------------|------------------------|-------------------------|--------------------------------|-------------------------|------------------------|---------------------------|--------------------|-----------------|--|--|
| A. lwofii NCTC 5866 (T)        | 68                        | 65             | 65                      | 63                        | 65                      | 60                         | 63                          | 63               | 63                 | 63                   | 63                   | 62                  | 64               | 65                      | 64                 | 64                   | 62                       | 61                 | 63                 | 64                      | 63                      | 64                 | 64              | 62         | 64                       | 62                             | 66                | 66                         | 68             | 63                     | 66                      | 71                             | 74                      | 72                     | 60                        | 72                 | 84              |  |  |
| A. lwofii SH145                | 69                        | 65             | 66                      | 63                        | 64                      | 60                         | 64                          | 65               | 63                 | 63                   | 63                   | 63                  | 65               | 65                      | 63                 | 64                   | 62                       | 61                 | 63                 | 64                      | 63                      | 64                 | 65              | 62         | 64                       | 61                             | 68                | 67                         | 70             | 64                     | 68                      | 73                             | 75                      | 73                     | 61                        | 75                 |                 |  |  |
| A. johnsonii SH046             | 72                        | 67             | 68                      | 66                        | 68                      | 63                         | 66                          | 67               | 66                 | 66                   | 66                   | 65                  | 67               | 67                      | 67                 | 66                   | 65                       | 64                 | 66                 | 68                      | 66                      | 66                 | 68              | 65         | 68                       | 64                             | 70                | 69                         | 72             | 67                     | 68                      | 71                             | 72                      | 71                     | 64                        |                    |                 |  |  |
| A. bereziniae LMG1003 (T)      | 64                        | 64             | 64                      | 63                        | 64                      | 60                         | 64                          | 60               | 63                 | 62                   | 62                   | 62                  | 64               | 64                      | 63                 | 63                   | 62                       | 60                 | 63                 | 65                      | 61                      | 63                 | 64              | 63         | 64                       | 61                             | 62                | 61                         | 63             | 65                     | 57                      | 61                             | 63                      | 62                     |                           |                    |                 |  |  |
| A. radioresistens SK82         | 70                        | 69             | 68                      | 68                        | 69                      | 65                         | 68                          | 65               | 68                 | 68                   | 68                   | 68                  | 69               | 70                      | 68                 | 69                   | 67                       | 66                 | 68                 | 69                      | 68                      | 68                 | 69              | 66         | 69                       | 66                             | 67                | 67                         | 68             | 67                     | 66                      | 87                             | 94                      |                        |                           |                    |                 |  |  |
| A. radioresistens SH164        | 72                        | 70             | 68                      | 71                        | 66                      | 70                         | 67                          | 69               | 69                 | 69                   | 69                   | 70                  | 72               | 70                      | 70                 | 68                   | 67                       | 70                 | 71                 | 69                      | 69                      | 70                 | 68              | 70         | 67                       | 68                             | 68                | 70                         | 68             | 68                     | 68                      | 87                             |                         |                        |                           |                    |                 |  |  |
| A. radioresistens DSM 6976 (T) | 70                        | 69             | 67                      | 66                        | 69                      | 65                         | 68                          | 66               | 67                 | 67                   | 67                   | 67                  | 68               | 69                      | 68                 | 68                   | 66                       | 65                 | 67                 | 69                      | 67                      | 66                 | 68              | 65         | 68                       | 65                             | 67                | 66                         | 68             | 66                     | 66                      |                                |                         |                        |                           |                    |                 |  |  |
| A. parvus DSM 16617 (T)        | 68                        | 64             | 63                      | 61                        | 63                      | 59                         | 62                          | 65               | 62                 | 61                   | 61                   | 61                  | 62               | 63                      | 61                 | 62                   | 60                       | 60                 | 61                 | 62                      | 61                      | 61                 | 62              | 60         | 62                       | 59                             | 71                | 69                         | 73             | 65                     |                         |                                |                         |                        |                           |                    |                 |  |  |
| A. baumannii NCTC 7422         | 69                        | 70             | 72                      | 69                        | 71                      | 67                         | 70                          | 64               | 70                 | 70                   | 70                   | 70                  | 70               | 71                      | 70                 | 70                   | 69                       | 67                 | 70                 | 72                      | 70                      | 70                 | 72              | 71         | 72                       | 67                             | 74                | 73                         | 75             |                        |                         |                                |                         |                        |                           |                    |                 |  |  |
| A. junii SH205                 | 71                        | 68             | 71                      | 69                        | 69                      | 66                         | 68                          | 66               | 69                 | 68                   | 68                   | 67                  | 69               | 69                      | 67                 | 68                   | 66                       | 66                 | 68                 | 69                      | 68                      | 69                 | 70              | 67         | 70                       | 66                             | 76                | 76                         |                |                        |                         |                                |                         |                        |                           |                    |                 |  |  |
| A. haemolyticus ATCC 19194     | 70                        | 68             | 70                      | 67                        | 69                      | 65                         | 68                          | 64               | 69                 | 69                   | 69                   | 68                  | 70               | 70                      | 68                 | 69                   | 67                       | 66                 | 68                 | 69                      | 68                      | 69                 | 70              | 67         | 70                       | 66                             | 84                |                            |                |                        |                         |                                |                         |                        |                           |                    |                 |  |  |
| A. sp. ATCC 27244              | 70                        | 69             | 71                      | 68                        | 70                      | 66                         | 69                          | 67               | 70                 | 69                   | 69                   | 69                  | 70               | 71                      | 68                 | 69                   | 67                       | 66                 | 69                 | 70                      | 69                      | 69                 | 71              | 68         | 71                       | 67                             |                   |                            |                |                        |                         |                                |                         |                        |                           |                    |                 |  |  |
| A. calcoaceticus DSM 30006 (T) | 66                        | 70             | 78                      | 76                        | 77                      | 74                         | 78                          | 66               | 77                 | 76                   | 77                   | 77                  | 80               | 77                      | 77                 | 76                   | 74                       | 77                 | 83                 | 78                      | 78                      | 79                 | 81              | 88         |                          |                                |                   |                            |                |                        |                         |                                |                         |                        |                           |                    |                 |  |  |
| A. calcoaceticus RUH2202       | 70                        | 74             | 83                      | 80                        | 81                      | 78                         | 83                          | 69               | 82                 | 81                   | 81                   | 82                  | 82               | 85                      | 83                 | 83                   | 81                       | 79                 | 82                 | 87                      | 82                      | 81                 | 85              | 87         |                          |                                |                   |                            |                |                        |                         |                                |                         |                        |                           |                    |                 |  |  |
| A. sp. DR1                     | 68                        | 74             | 84                      | 79                        | 80                      | 76                         | 82                          | 66               | 80                 | 82                   | 82                   | 82                  | 81               | 84                      | 83                 | 81                   | 82                       | 79                 | 82                 | 88                      | 80                      | 80                 | 82              |            |                          |                                |                   |                            |                |                        |                         |                                |                         |                        |                           |                    |                 |  |  |
| A. pittii SH024                | 70                        | 72             | 84                      | 81                        | 81                      | 79                         | 84                          | 69               | 84                 | 82                   | 82                   | 82                  | 84               | 84                      | 82                 | 83                   | 81                       | 78                 | 82                 | 87                      | 86                      | 88                 |                 |            |                          |                                |                   |                            |                |                        |                         |                                |                         |                        |                           |                    |                 |  |  |
| A. pittii DSM 9306             | 69                        | 70             | 81                      | 79                        | 79                      | 77                         | 81                          | 69               | 81                 | 79                   | 79                   | 79                  | 80               | 82                      | 79                 | 79                   | 79                       | 75                 | 78                 | 84                      | 85                      |                    |                 |            |                          |                                |                   |                            |                |                        |                         |                                |                         |                        |                           |                    |                 |  |  |
| A. pittii DSM 21653 (T)        | 69                        | 71             | 81                      | 78                        | 79                      | 76                         | 80                          | 66               | 80                 | 79                   | 79                   | 79                  | 82               | 78                      | 79                 | 78                   | 76                       | 79                 | 86                 |                         |                         |                    |                 |            |                          |                                |                   |                            |                |                        |                         |                                |                         |                        |                           |                    |                 |  |  |
| A. calcoaceticus PHEA-2        | 71                        | 76             | 84                      | 81                        | 84                      | 80                         | 85                          | 68               | 84                 | 83                   | 82                   | 84                  | 83               | 88                      | 84                 | 84                   | 83                       | 80                 | 84                 |                         |                         |                    |                 |            |                          |                                |                   |                            |                |                        |                         |                                |                         |                        |                           |                    |                 |  |  |
| A. baumannii W7282             | 69                        | 71             | 82                      | 80                        | 83                      | 81                         | 85                          | 72               | 84                 | 85                   | 85                   | 86                  | 86               | 87                      | 90                 | 90                   | 93                       | 93                 |                    |                         |                         |                    |                 |            |                          |                                |                   |                            |                |                        |                         |                                |                         |                        |                           |                    |                 |  |  |
| A. baumannii W6976             | 67                        | 69             | 79                      | 78                        | 79                      | 77                         | 81                          | 70               | 80                 | 81                   | 81                   | 83                  | 82               | 83                      | 86                 | 86                   | 89                       |                    |                    |                         |                         |                    |                 |            |                          |                                |                   |                            |                |                        |                         |                                |                         |                        |                           |                    |                 |  |  |
| A. baumannii TCDC-AB0715       | 68                        | 70             | 82                      | 79                        | 82                      | 80                         | 85                          | 70               | 83                 | 87                   | 87                   | 87                  | 85               | 86                      | 92                 | 91                   |                          |                    |                    |                         |                         |                    |                 |            |                          |                                |                   |                            |                |                        |                         |                                |                         |                        |                           |                    |                 |  |  |
| A. baumannii 6014059           | 69                        | 72             | 82                      | 80                        | 83                      | 81                         | 87                          | 70               | 86                 | 85                   | 85                   | 86                  | 87               | 87                      | 92                 |                      |                          |                    |                    |                         |                         |                    |                 |            |                          |                                |                   |                            |                |                        |                         |                                |                         |                        |                           |                    |                 |  |  |
| A. baumannii ACICU             | 69                        | 72             | 84                      | 79                        | 83                      | 80                         | 86                          | 68               | 84                 | 85                   | 85                   | 87                  | 85               | 87                      |                    |                      |                          |                    |                    |                         |                         |                    |                 |            |                          |                                |                   |                            |                |                        |                         |                                |                         |                        |                           |                    |                 |  |  |
| A. baumannii AB307-0294        | 70                        | 74             | 85                      | 82                        | 85                      | 82                         | 88                          | 70               | 86                 | 90                   | 90                   | 91                  | 91               |                         |                    |                      |                          |                    |                    |                         |                         |                    |                 |            |                          |                                |                   |                            |                |                        |                         |                                |                         |                        |                           |                    |                 |  |  |
| A. baumannii AYE               | 69                        | 71             | 84                      | 81                        | 83                      | 80                         | 86                          | 70               | 84                 | 88                   | 88                   | 92                  |                  |                         |                    |                      |                          |                    |                    |                         |                         |                    |                 |            |                          |                                |                   |                            |                |                        |                         |                                |                         |                        |                           |                    |                 |  |  |
| A. baumannii AB0057            | 68                        | 72             | 83                      | 80                        | 83                      | 81                         | 86                          | 70               | 84                 | 89                   | 89                   |                     |                  |                         |                    |                      |                          |                    |                    |                         |                         |                    |                 |            |                          |                                |                   |                            |                |                        |                         |                                |                         |                        |                           |                    |                 |  |  |
| A. baumannii 6013150           | 68                        | 71             | 83                      | 79                        | 82                      | 80                         | 85                          | 69               | 83                 | 99                   |                      |                     |                  |                         |                    |                      |                          |                    |                    |                         |                         |                    |                 |            |                          |                                |                   |                            |                |                        |                         |                                |                         |                        |                           |                    |                 |  |  |
| A. baumannii 6013113           | 68                        | 71             | 83                      | 79                        | 82                      | 80                         | 85                          | 69               | 83                 |                      |                      |                     |                  |                         |                    |                      |                          |                    |                    |                         |                         |                    |                 |            |                          |                                |                   |                            |                |                        |                         |                                |                         |                        |                           |                    |                 |  |  |
| A. baumannii AB900             | 69                        | 71             | 83                      | 81                        | 82                      | 82                         | 86                          | 70               |                    |                      |                      |                     |                  |                         |                    |                      |                          |                    |                    |                         |                         |                    |                 |            |                          |                                |                   |                            |                |                        |                         |                                |                         |                        |                           |                    |                 |  |  |
| A. baumannii SDF               | 65                        | 67             | 69                      | 68                        | 70                      | 68                         | 69                          |                  |                    |                      |                      |                     |                  |                         |                    |                      |                          |                    |                    |                         |                         |                    |                 |            |                          |                                |                   |                            |                |                        |                         |                                |                         |                        |                           |                    |                 |  |  |
| A. baumannii ATCC 19606 (T)    | 69                        | 72             | 83                      | 81                        | 84                      | 82                         |                             |                  |                    |                      |                      |                     |                  |                         |                    |                      |                          |                    |                    |                         |                         |                    |                 |            |                          |                                |                   |                            |                |                        |                         |                                |                         |                        |                           |                    |                 |  |  |
| A. nosocomialis NCTC 10304     | 66                        | 68             | 78                      | 78                        | 80                      |                            |                             |                  |                    |                      |                      |                     |                  |                         |                    |                      |                          |                    |                    |                         |                         |                    |                 |            |                          |                                |                   |                            |                |                        |                         |                                |                         |                        |                           |                    |                 |  |  |
| A. baumannii ATCC 17978        | 70                        | 73             | 81                      | 79                        |                         |                            |                             |                  |                    |                      |                      |                     |                  |                         |                    |                      |                          |                    |                    |                         |                         |                    |                 |            |                          |                                |                   |                            |                |                        |                         |                                |                         |                        |                           |                    |                 |  |  |
| A. nosocomialis NCTC 8102      | 68                        | 69             | 84                      |                           |                         |                            |                             |                  |                    |                      |                      |                     |                  |                         |                    |                      |                          |                    |                    |                         |                         |                    |                 |            |                          |                                |                   |                            |                |                        |                         |                                |                         |                        |                           |                    |                 |  |  |
| A. nosocomialis RUH2624        | 71                        | 72             |                         |                           |                         |                            |                             |                  |                    |                      |                      |                     |                  |                         |                    |                      |                          |                    |                    |                         |                         |                    |                 |            |                          |                                |                   |                            |                |                        |                         |                                |                         |                        |                           |                    |                 |  |  |
| A. baylyi ADP1                 | 74                        |                |                         |                           |                         |                            |                             |                  |                    |                      |                      |                     |                  |                         |                    |                      |                          |                    |                    |                         |                         |                    |                 |            |                          |                                |                   |                            |                |                        |                         |                                |                         |                        |                           |                    |                 |  |  |

**Additional File 6.** Gene content comparison of the 38 strains in this study, table values represent the percentage of shared CDSs for each pair of strains. While strains from the same species generally share at least 80% of their CDSs, strains from different species can exhibit similar ratios (ratios  $\geq 80\%$  shown in gray). For example, *A. calcoaceticus* RUH2202 shares more than 80% of its CDS repertoire with DR1 and various *A. nosocomialis*, *A. baumannii*, *A. pittii* strains; PHEA-2 and DR1 share 88.1% of their CDSs, etc. Based on gene content only, *A. baumannii* SDF is distinct from all other *A. baumannii* strains in our study (shares at most 71.6%), which explains its placement in the K-string (Additional File 4) and genomic fluidity (Additional File 5) dendrograms. These results indicate a potentially significant level of horizontal gene transfer among *Acinetobacter* species and illustrate an inability to delineate species based on gene content comparison only.
